# Supplementary material
Source: PubMed Central journal article supplement (PMC4540073)
Supplement: NIHMS166752-supplement-Sup.pdf [file NIHMS166752-supplement-Sup.pdf]

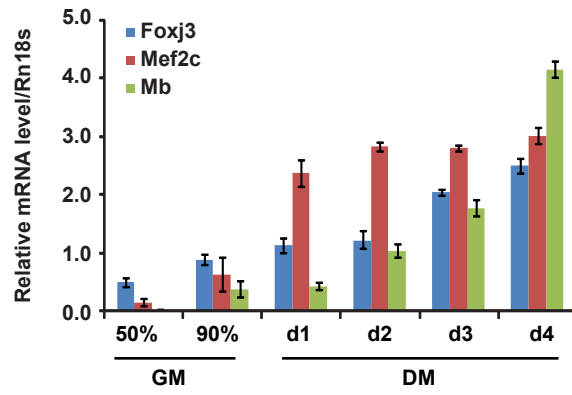

Alexander, Supplemental Figure S1

|                       | <b>Foxj3 +/+</b> | <b>Foxj3 +/-</b> | <b>Foxj3 m/m</b> | <b>Total</b> |
|-----------------------|------------------|------------------|------------------|--------------|
| <b>Number</b>         | <b>21</b>        | <b>46</b>        | <b>17</b>        | <b>84</b>    |
| <b>Percentage (%)</b> | <b>25</b>        | <b>55</b>        | <b>20</b>        | <b>100</b>   |

**Alexander, Supplemental Figure S2**

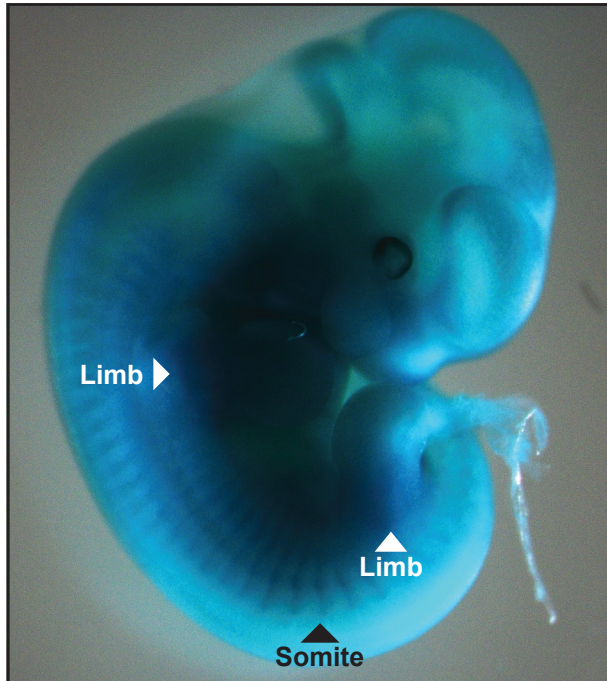

Alexander, Supplemental Figure S3

**Foxj3 +/+**

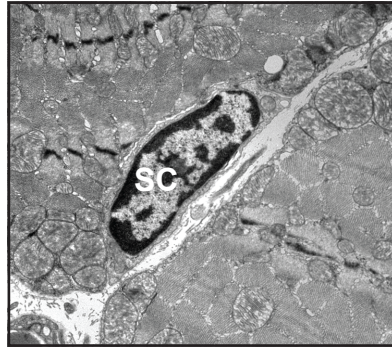

**Foxj3 m/m**

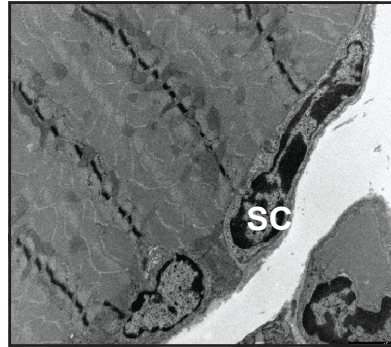

**Alexander, Supplemental Figure S4**

**A**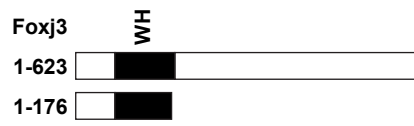**B**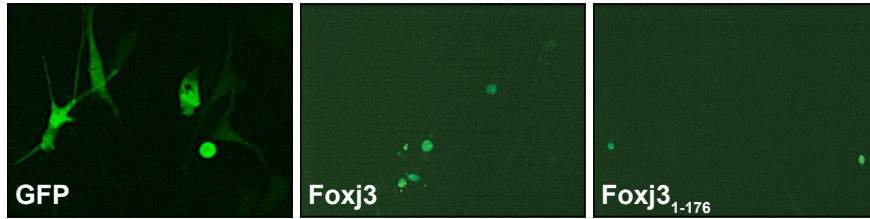**C**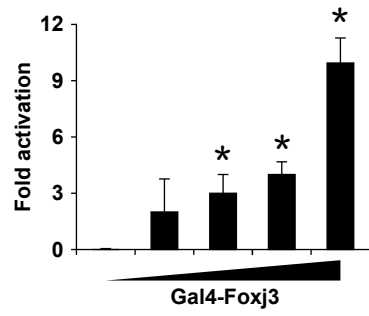**D**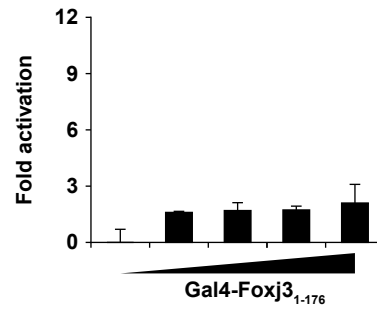**E**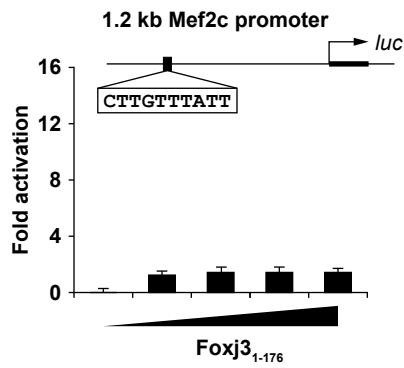**H**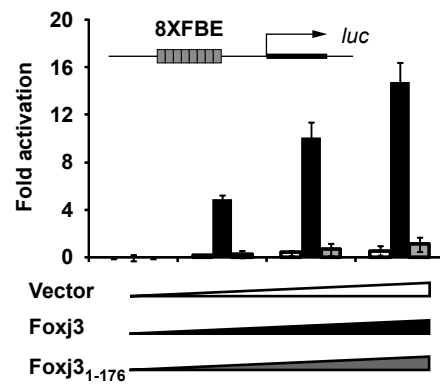

Alexander, Supplemental Figure S5

## RT-PCR Primers

| <u>Primer</u> | <u>Sequence</u>                |
|---------------|--------------------------------|
| Foxj3_F       | 5' AGCCTAACATCTATGGACTGGT 3'   |
| Foxj3_R       | 5' GGTCAAGGAGTGCATTCTTCTTA 3'  |
| Mef2c_F       | 5' GTCTCACCTGGTAACCTGAACAAG 3' |
| Mef2c_R       | 5' GCAGATGGCGGCATGTTATGTAGG 3' |
| Mef2d_F       | 5' CCACACGAGAGCCGCACCAATGC 3'  |
| Mef2d_R       | 5' GGCAAAGTTGGGGGCCGGAACAG 3'  |
| Tnni1_F       | 5' GAAATCCAAGATCACTGCCTCCC 3'  |
| Tnni1_R       | 5' CCACCACCTCTACCTTGGCATG 3'   |
| Tnnt2_F       | 5' GCCACCCAAGATCCCCGATGGAG 3'  |
| Tnnt2_R       | 5' CCTCCTCCTCACGCCGGGCCCTC 3'  |
| Cdkn1a_F      | 5' TTGCACTCTGGTGTCTGAGC 3'     |
| Cdkn1a_R      | 5' CTGCGCTTGGAGTGATAGAA 3'     |
| Gapdh_F       | 5' GTGGCAAAGTGGAGATTGTTGCC 3'  |
| Gapdh_R       | 5' GATGATGACCCGTTTGGCTCC 3'    |
| 18sRb_F       | 5' CTCAACACGGGAAACCTCAC 3'     |
| 18sRb_R       | 5' TGCCAGAGTCTCGTTCGTTAT 3'    |
| Mb_F          | 5' CCTGGGTACCATCCTGAAGA 3'     |
| Mb_R          | 5' GAGCATCTGCTCCAAAGTCC 3'     |

Alexander, Supplemental Table 1

## Supplemental Materials and Methods

**Genotyping of Foxj3 mutant mice.** The  $\beta$ -geo cassette from the XL913 BayGenomics cell line was mapped to approximately 1.8 kb from the end of exon 5 of the Foxj3 locus on the *cis*-DNA genomic strand. Tail clippings were digested in Proteinase K (Sigma) at 55°C for 3 hours. 2  $\mu$ L of tail DNA was used to amplify an 800 base pair WT amplicon, and a 300 base pair mutant band using the following primers: Foxj3GT-F: 5' GATGTCTGGGAAAGGAAGCTT 3'; Foxj3GT-R: 5' CTTTTTGGTTGCTTGGTTGGT 3';  $\beta$ -gal/vector\_R: 5' CGTGTCCTACAACACACACTCCAACC 3'.

**LacZ staining.** Transgenic embryos were harvested at E11.5, fixed in 4% PFA (pH7.4) for 45 minutes at 4°C, rinsed with the rinse buffer (100mM NaCl, 2mM MgCl<sub>2</sub>, 0.01% sodium deoxycholate, and 0.02% NP-40) for 10 min at room temperature three times and stained with fresh staining solution (rinse buffer plus 5mM potassium ferricyanide, 5mM potassium ferrocyanide, 1mg/ml X-gal) overnight at 37 °C, followed by post-fix in 4% PFA overnight at 4°C. The stained embryos were washed with PBS, visualized by Zeiss Stereo Discovery v.20 macro/stereo microscope with AxioCam MRc5 camera and photographed with Axio Vision 6 software.

## Supplemental Figure Legends

**Supplemental Figure S1. Foxj3 is expressed in C2C12 myoblasts.** Quantitative PCR analysis of transcript expression during C2C12 differentiation

from myoblasts (50% or 90% confluency, cultured in growth medium or GM) to myotubes (day 1 or d1 to day 4 or d4, cultured in differentiation medium or DM) demonstrates that Foxj3 and Mef2c are expressed in myoblasts prior to myoglobin (Mb) expression.

**Supplemental Figure S2. Foxj3m/m pups are born at Mendelian ratios.**

Table indicating that Foxj3m/m pups are viable and follow Mendelian genetic ratios (n = 8 Foxj3+/m matings).

**Supplemental Figure S3. Foxj3 is expressed in the developing somites during murine embryogenesis.** LacZ staining in the E11.5 Foxj3+/m embryo reveals Foxj3 expression within the developing somites (black arrowhead) and limbs (white arrowheads).

**Supplemental Figure S4. Foxj3 mutant mice have satellite cells.**

Transmission electron microscopy of TA muscles reveals the presence of satellite cells (SC) in skeletal muscle of both wild type and Foxj3 mutant mice.

**Supplemental Figure S5. Foxj3 functions as a transcriptional activator of gene expression. A)** Schematic of Foxj3 constructs used in the transfection assays (WH, winged helix). **B)** Transfection of the respective constructs and the GFP control. **C)** Using the Gal4 assay, Foxj3 in a dose dependent fashion functions as a transcriptional activator (n = 3; \*p < 0.05). **D)** Transcriptional assay using the Foxj3 mutant construct that lacks the C-terminal region lacks



transcriptional activity. **E)** Transcriptional assay using the Foxj3 mutant construct that lacks the C-terminal region lacks transcriptional activity using the 1.2 kb Mef2c promoter-luc plasmid. **F)** Using transcriptional assays and the multimerized FBE (8XFBE, *forkhead* binding element) fused to the luciferase reporter reveals that full length Foxj3 functions in a dose dependent fashion as a transcriptional activator. Note that vector alone or the Foxj3 mutant construct (Foxj3<sub>1-176</sub>) lack transcriptional activity.

**Supplemental Table 1.** RT-PCR primers used in this study.
